# Supplementary material for: Microporous mixed-metal mixed-ligand metal organic framework for selective CO2 capture
Source: Royal Society of Chemistry journal article supplement (doi:10.1039/c8ce00752g), 2018-01-01
Supplement: c8ce00752g1.pdf [file c8ce00752g1.pdf]

Supporting Information for

## A Microporous Mixed Metal-Mixed Ligand Metal Organic Framework for Selective CO<sub>2</sub> Capture

Rahul Maity,<sup>a</sup> Debanjan Chakraborty,<sup>a</sup> Shyamapada Nandi,<sup>a</sup> Kushwaha Rinku<sup>a</sup> and Ramanathan Vaidhyanathan<sup>ab\*</sup>

<sup>a</sup> Department of Chemistry, Indian Institute of Science Education and Research, Pune, 411008 India

<sup>b</sup> Centre for Research in Energy and Sustainable Materials, Centre for Energy Science, Indian Institute of Science Education and Research Pune, Dr Homi Bhabha Rd, Pashan, Pune, 411008, MH, India.

E-mail: [vaidhya@iiserpune.ac.in](mailto:vaidhya@iiserpune.ac.in)

### List of contents:

#### 1. Materials and methods

*Synthesis*  
*Single crystal X-ray diffraction*

#### 2. Analytical characterizations:

*Powder diffraction,*  
*TGA studies*  
*IR-spectra*

#### 3. Scanning Electron Microscopy- Energy-dispersive X-ray spectroscopy (EDX) Analysis

#### 4. Adsorption studies:

*Langmuir single site modelling,*  
*Heat of adsorption for CO<sub>2</sub> from Virial and NLDFT models,*  
*IAST calculations,*  
*Iso-Cycling*  
*Rate of adsorption studies- self-diffusion coefficients calculations and analysis*

#### 5. Stability studies

*PXRD*  
*CO<sub>2</sub> adsorption*  
*Variable temperature PXRD*  
*Optical microscopic images of the MOF crystal*

#### 6. Simulation studies

## 1. Materials and methods

All the reagents were bought from Sigma Aldrich. For the synthesis all reagents and solvents were used without any further purification.

### Synthesis of IISERP-MOF24:

A mixture of  $\text{Ce}(\text{NO}_3)_3 \cdot 6\text{H}_2\text{O}$  (95.0 mg, 0.219 mmol), iminodiacetic acid ( $\text{H}_3\text{IMDA}$ , 69.0 mg, 0.519 mmol), and 4,4'-biphenyldicarboxylic acid ( $\text{H}_2\text{BPDC}$ , 65 mg, 0.269 mmol) was dissolved into a mixed solvent of *N,N'*-dimethyl formamide (DMF) and  $\text{H}_2\text{O}$  (9 mL; v/v = 8:1) in a screw-capped vial (20 mL), to which 50  $\mu\text{L}$  of 10 M NaOH was added. The vial was capped and heated in an oven at 90 °C for 5 days. Colourless prismatic crystals were obtained by filtration and washed several times with DMF to afford IISERP-MOF24 in 75% yield based on metal salt. The experimental powder X-ray diffraction (XRD) profile of IISERP-MOF24 matches well with the simulated one based on the single-crystal X-ray data, indicating that the sample forms as a pure phase. (CHN: Calc. C- 37.70; H- 3.74; N- 3.66: Obsd. 37.79; 3.64, 5.35) calculated using the formula:  $\text{Ce}_3\text{Na}_3(\text{C}_{14}\text{H}_8\text{O}_4)_3(\text{C}_4\text{H}_5\text{NO}_4)_3 \cdot (\text{C}_3\text{H}_7\text{NO})_2(\text{H}_2\text{O})_9$ . The discrepancies in the observed values could be attributed to the partial loss of the solvent molecules when exposed to air.

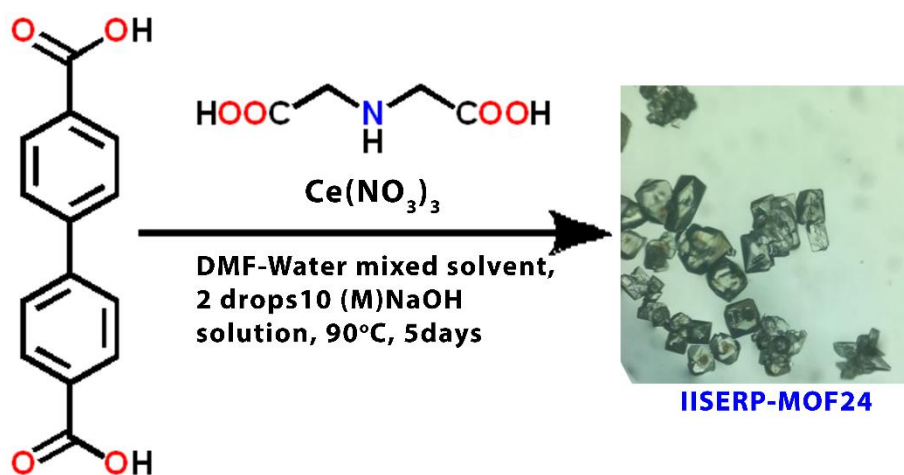

**Scheme S1.** Schematic representation of the synthesis of IISERP-MOF24.

## Solvent composition of IISERP-MOF24 using SQUEEZE and analytical data

Asymmetric unit present in IISERP-MOF24 is  $\text{Ce}_{0.5}\text{Na}_{0.5}(\text{BPDC})_{0.5}(\text{IMDA})_{0.5}$

Formula unit present in IISERP-MOF24 is  $\text{Ce}_3\text{Na}_3(\text{BPDC})_3(\text{IMDA})_3$ .

So, Formula unit is just six times of the asymmetric unit.

Again, Z for IISERP-MOF24 is 3.

So, 3 units of  $\text{Ce}_3\text{Na}_3(\text{BPDC})_3(\text{IMDA})_3$  and  $(6 \times 3) = 18$  units of  $\text{Ce}_{0.5}\text{Na}_{0.5}(\text{BPDC})_{0.5}(\text{IMDA})_{0.5}$  are present in unit Cell.

Again, squeeze results suggest that 507 electrons are present from solvent molecules in the unit cell.

So, per asymmetric unit  $507 / (6 \times 3) = 28.6$  electrons are present &

Per formula unit  $507/3 = 169$  electrons are present.

Number of Solvent molecules determination:

CHN analysis:

| No. of DMF | No. of water | Electron counts                       | CHN analysis                                                            |
|------------|--------------|---------------------------------------|-------------------------------------------------------------------------|
| 2          | 9            | $(2 \times 40) + (9 \times 10) = 170$ | Calc: C = 37.7, H = 3.74, N = 3.66<br>(Obsd. 37.79, H = 3.64, N = 5.35) |

So, actually from CHN analysis it is understandable that 2 DMF and 9 water molecules present in the formula unit,  $\text{Ce}_3\text{Na}_3(\text{C}_{14}\text{H}_8\text{O}_4)_3(\text{C}_4\text{H}_5\text{NO}_4)_3 \cdot (\text{C}_3\text{H}_7\text{NO})_2(\text{H}_2\text{O})_9$ .

TGA analysis: (For TGA plot see figure S3)

Molecular mass of formula unit **without** solvent  $\text{Ce}_3\text{Na}_3(\text{BPDC})_3(\text{IMDA})_3$  is 1603.2.

Now, molecular mass of formula unit **with** solvent  $\text{Ce}_3\text{Na}_3(\text{BPDC})_3(\text{IMDA})_3(\text{DMF})_2(\text{H}_2\text{O})_9$  is  $1603.2 + (9 \times 18) + (2 \times 40) = 1911.533$ .

% mass of DMF =  $(160/1911) \times 100 = 8.4$

% mass of water =  $(162/1911) \times 100 = 8.5$

**Total calculated % mass loss =  $(8.4 + 8.5) = 16.9$**

Note that there are solvent losses at low temperatures from the surface adsorbed methanol molecules used during the washing of the sample. This most likely is the origin of the discrepancy in the calculated and the observed CHN values.

**Table S1.** Crystal structure information for the solvated and squeezed structure of IISERP-MOF24 obtained from SCXRD and PLATON analysis.

| Parameters                            | Non-squeezed IISERP-MOF24                                                                                                                                                              | Squeezed IISERP-MOF24                                                                                                                                       |
|---------------------------------------|----------------------------------------------------------------------------------------------------------------------------------------------------------------------------------------|-------------------------------------------------------------------------------------------------------------------------------------------------------------|
| Chemical formula                      | *Ce <sub>3</sub> Na <sub>3</sub> (C <sub>14</sub> H <sub>8</sub> O <sub>4</sub> ) <sub>3</sub> (C <sub>4</sub> H <sub>5</sub> NO <sub>4</sub> ) <sub>3</sub> •(solvent) <sub>x</sub> . | Ce <sub>3</sub> Na <sub>3</sub> (C <sub>14</sub> H <sub>8</sub> O <sub>4</sub> ) <sub>3</sub> (C <sub>4</sub> H <sub>5</sub> NO <sub>4</sub> ) <sub>3</sub> |
| Formula weight                        | 1911.5                                                                                                                                                                                 | 1603.19                                                                                                                                                     |
| Crystal system                        | Trigonal                                                                                                                                                                               | Trigonal                                                                                                                                                    |
| Space group                           | R32                                                                                                                                                                                    | R32                                                                                                                                                         |
| Unit-cell parameter                   | a(Å) =12.8523(4), b(Å) =12.8523(4), c(Å) =45.7558(17),<br>α = 90°, β = 90°, γ = 120°, V(Å <sup>3</sup> ) = 6545.43(4)                                                                  | a(Å) =12.8523(4), b(Å) =12.8523(4),<br>c(Å) =45.7558(17), α = 90°,<br>β = 90°, γ = 120°,<br>V(Å <sup>3</sup> ) = 6545.43(4)                                 |
| Crystal color                         | Colorless prismatic crystal                                                                                                                                                            | Colorless prismatic crystal                                                                                                                                 |
| Temperature                           | 100(2)                                                                                                                                                                                 | 100(2)                                                                                                                                                      |
| No. of formula units in unit cell (Z) | 3                                                                                                                                                                                      | 3                                                                                                                                                           |
| Density (g cm <sup>-3</sup> )         | 1.27                                                                                                                                                                                   | 1.22                                                                                                                                                        |
| Abs. Coeff. (mm <sup>-1</sup> )       | 12.578                                                                                                                                                                                 | 12.522                                                                                                                                                      |
| F(000)                                | 2436.0                                                                                                                                                                                 | 2340.0                                                                                                                                                      |
| Flack                                 | 0.007 (5)                                                                                                                                                                              | -0.087(7)                                                                                                                                                   |
| <b>Reflection Data</b>                |                                                                                                                                                                                        |                                                                                                                                                             |
| No. of reflections meas.              | 17802                                                                                                                                                                                  | 5365                                                                                                                                                        |
| No. of uniq. reflections              | 2862                                                                                                                                                                                   | 2862                                                                                                                                                        |
| No. of obs. reflections               | 2834                                                                                                                                                                                   | 2821                                                                                                                                                        |
| λ (Å)                                 | 1.54178                                                                                                                                                                                | 1.54178                                                                                                                                                     |
| R <sub>merge</sub>                    | 0.041                                                                                                                                                                                  | 0.027                                                                                                                                                       |
| Av. I/sig(I)                          | 31.35                                                                                                                                                                                  | 24.88                                                                                                                                                       |
| θ <sub>max</sub>                      | 72.3                                                                                                                                                                                   | 72.3                                                                                                                                                        |
| θ <sub>min</sub>                      | 4.4                                                                                                                                                                                    | 4.4                                                                                                                                                         |
| <b>Refinement Data</b>                |                                                                                                                                                                                        |                                                                                                                                                             |

|                                                                           |        |        |
|---------------------------------------------------------------------------|--------|--------|
| R <sub>all</sub>                                                          | 0.036  | 0.028  |
| R <sub>obs</sub>                                                          | 0.036  | 0.027  |
| wR <sub>2(all)</sub>                                                      | 0.120  | 0.080  |
| wR <sub>2(obs)</sub>                                                      | 0.120  | 0.080  |
| Ext. Coeff.                                                               | 0.0002 | 0.0003 |
| Goodness-of-fit (GOOF)                                                    | 1.193  | 1.132  |
| Largest diff. peak and hole: Delta-rho (eÅ <sup>-3</sup> ) <sub>max</sub> | 1.276  | 1.044  |
| Largest diff. peak and hole: Delta-rho (eÅ <sup>-3</sup> ) <sub>min</sub> | -0.906 | -0.623 |

**\*Note.** PLATON analysis suggests the presence of substantial amount of solvent accessible voids in the structure of IISERP-MOF24 (Ce<sub>3</sub>Na<sub>3</sub>(C<sub>14</sub>H<sub>8</sub>O<sub>4</sub>)<sub>3</sub>(C<sub>4</sub>H<sub>5</sub>NO<sub>4</sub>)<sub>3</sub>•(solvent)<sub>x</sub>). The solvents could not be modelled satisfactorily. From the *SQUEEZE* analysis was carried out to determine the number of DMF & H<sub>2</sub>O molecules. From squeezed electron counts and with the aid of feasible analytical methods like TGA & elemental (CHN) analysis the solvent content was estimated. It was found that 2 DMF and 9 water molecules present in the each formula unit of IISERP-MOF24 (Ce<sub>3</sub>Na<sub>3</sub>(C<sub>14</sub>H<sub>8</sub>O<sub>4</sub>)<sub>3</sub>(C<sub>4</sub>H<sub>5</sub>NO<sub>4</sub>)<sub>3</sub>). So, actual formula of IISERP-MOF24 is Ce<sub>3</sub>Na<sub>3</sub>(C<sub>14</sub>H<sub>8</sub>O<sub>4</sub>)<sub>3</sub>(C<sub>4</sub>H<sub>5</sub>NO<sub>4</sub>)<sub>3</sub>•(C<sub>3</sub>H<sub>7</sub>NO)<sub>2</sub>(H<sub>2</sub>O)<sub>9</sub>.

### The structure of IISERP-MOF24:

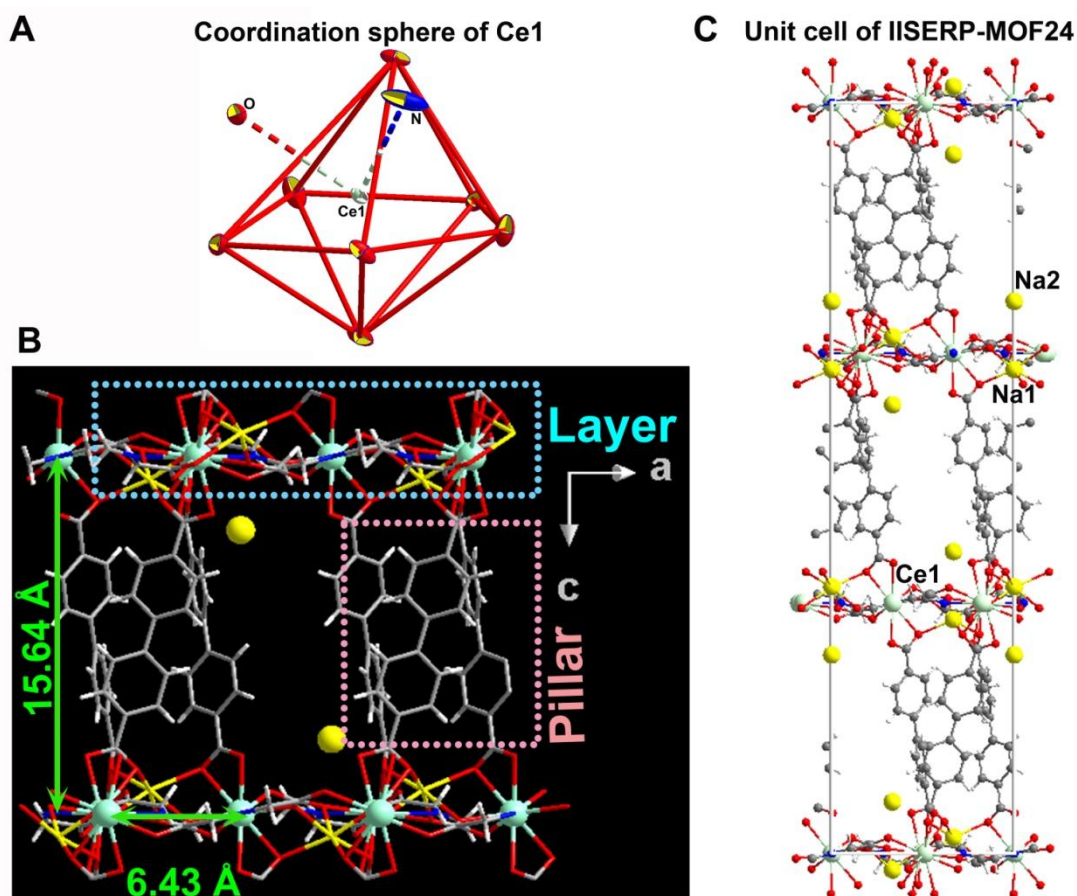

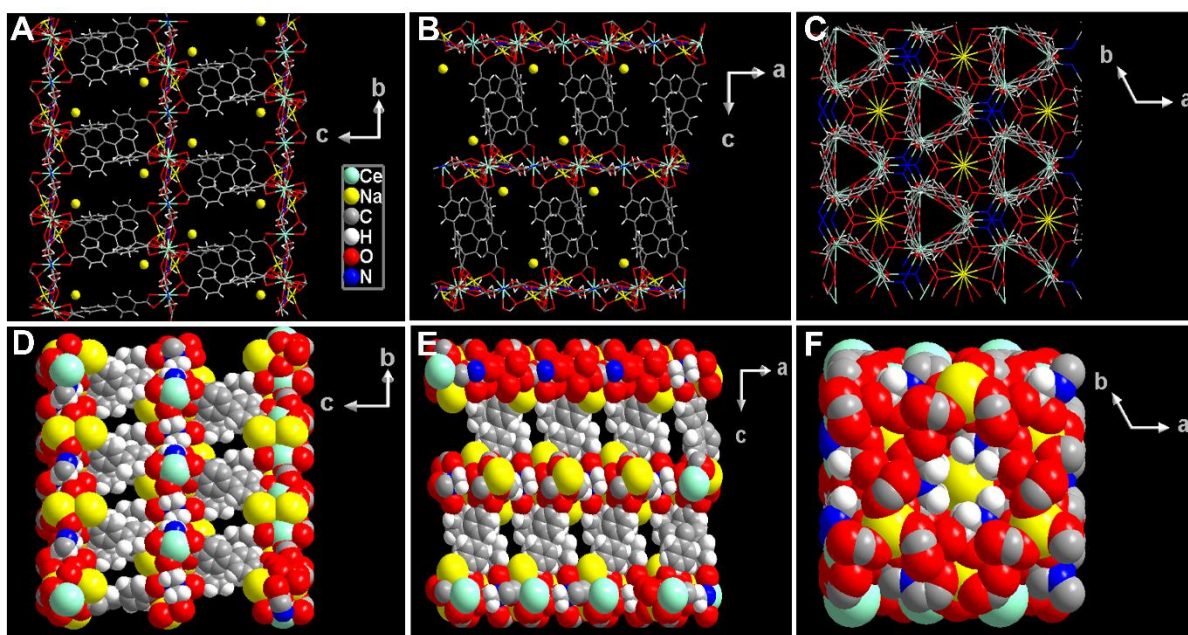

**Figure S1. Top:** (A) Shows the coordination sphere of Cerium ions, which adopts a bicapped pentagonal bipyramidal geometry. (B) The 3D layered-pillared topology of IISERP-MOF24. (C) The unit cell of IISERP-MOF24 showing selected atomic labels. The thermal ellipsoids are plotted at 50% probability. **Bottom:** (A) View along a-axis, (B) View along b-axis (a layered pillared structure), (C) View along c- axis, (D) Space-fill model along a-axis (without pore DMF and water molecules), (E) Space-fill model along b- axis and (F) Space fill model along c- axis.

## 2. Analytical characterizations

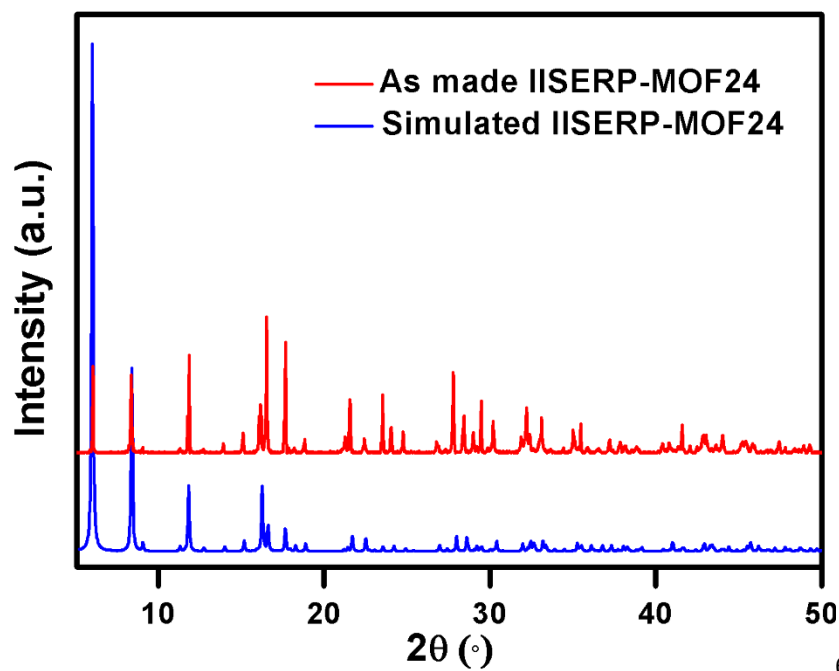

**Figure S2.** Comparison between the powder X-ray diffraction patterns simulated from the single crystal data and the experimentally obtained one.

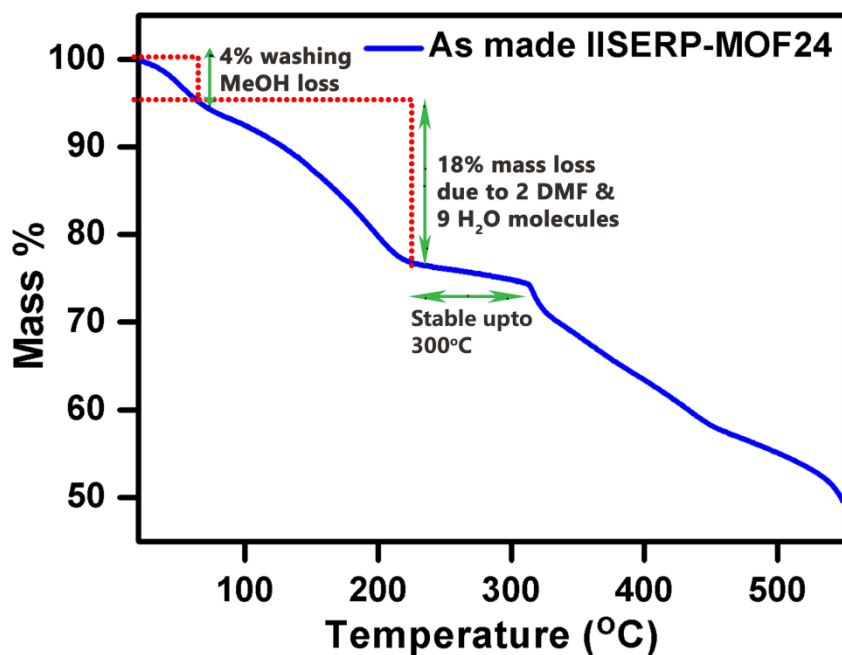

**Figure S3.** TGA carried out on the as made IISERP-MOF24. A two step weight loss is observed from room temperature to 220 °C. The first weight loss up to 100 °C is due to the evaporation of pore water molecules, while the second weight loss observed from 100 °C to 220 °C is due to the loss of DMF molecules trapped inside the pore (total Wt. loss calc.: 23.9%; obsd: 24.0%). The weight loss have been calculated using the formula  $\text{Ce}_3\text{Na}_3(\text{C}_{14}\text{H}_8\text{O}_4)_3(\text{C}_4\text{H}_5\text{NO}_4)_3 \cdot (\text{C}_3\text{H}_7\text{NO})_2(\text{H}_2\text{O})_9$  (M. Wt. 1603.2 g/mol).

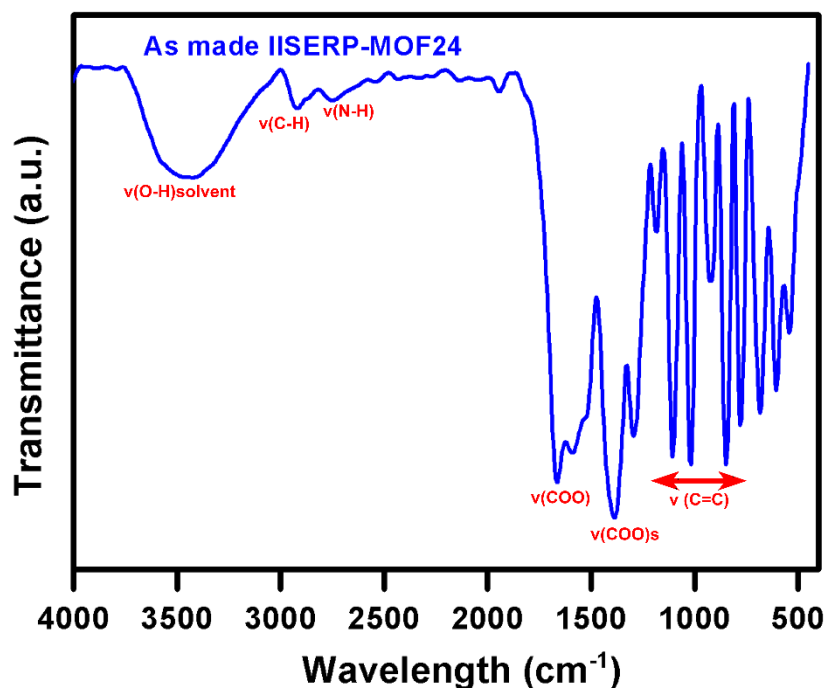

**Figure S4.** Infrared spectra (IR) of IISERP-MOF24 showing the various stretching and bending modes present. Selected peaks: IR (KBr pellet,  $\text{cm}^{-1}$ ):  $\nu(\text{O-H})_{\text{solvent}}$ : 3455s;  $\nu(\text{C-H})$ : 2924;  $\nu(\text{N-H})$ : 2749;  $\nu(\text{COO})$ : 1662s and 1593vs,  $\nu(\text{COO})_s$  1396s, 1300 vs;  $\nu(\text{C=C})$ : 1190 to 780. (Source: *Infrared and Raman Spectra of Inorganic and Coordination Compounds, Part B, Applications in Coordination, Organometallic, and Bioinorganic Chemistry, 6th Edition, Kazuo Nakamoto*).



### 3. Scanning Electron Microscopy- Energy-dispersive X-ray spectroscopy (EDX) Analysis

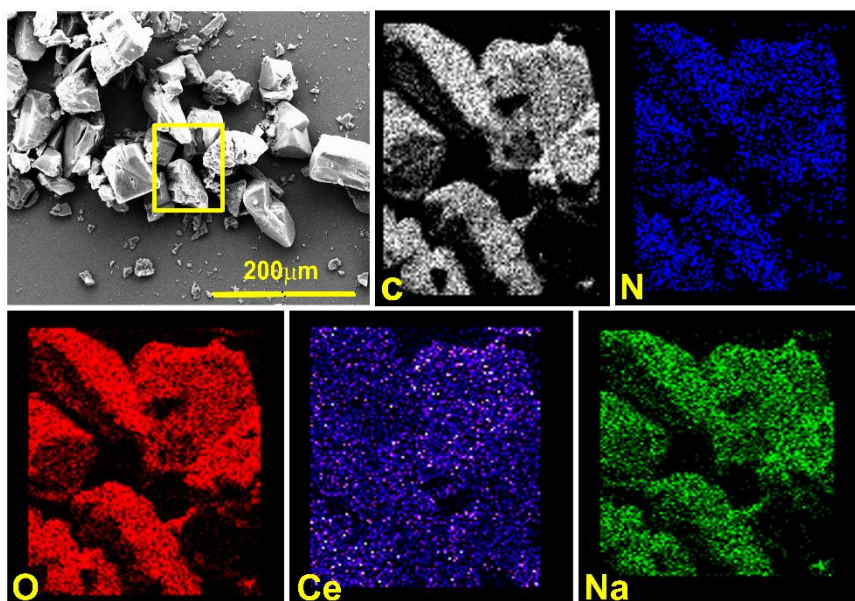

**Figure S5.** Elemental mapping using Energy-dispersive X-ray analysis (EDXA) technique shows homogeneous distributions of both the Ce and Na in IISERP-MOF24.

#### Calculation of Ce:Na from SEM-EDX analysis:

From the composition determined from SCXRD analysis  $(\text{Ce}_3\text{Na}_3(\text{C}_{14}\text{H}_8\text{O}_4)_3(\text{C}_4\text{H}_5\text{NO}_4)_3 \cdot (\text{C}_3\text{H}_7\text{NO})_2(\text{H}_2\text{O})_9)$ , a ratio Ce:Na of 1.00 is expected. EDXA was performed on five different regions of the sample. The results are presented below.



## SEM-EDX & elemental analysis of IISERP-MOF24:

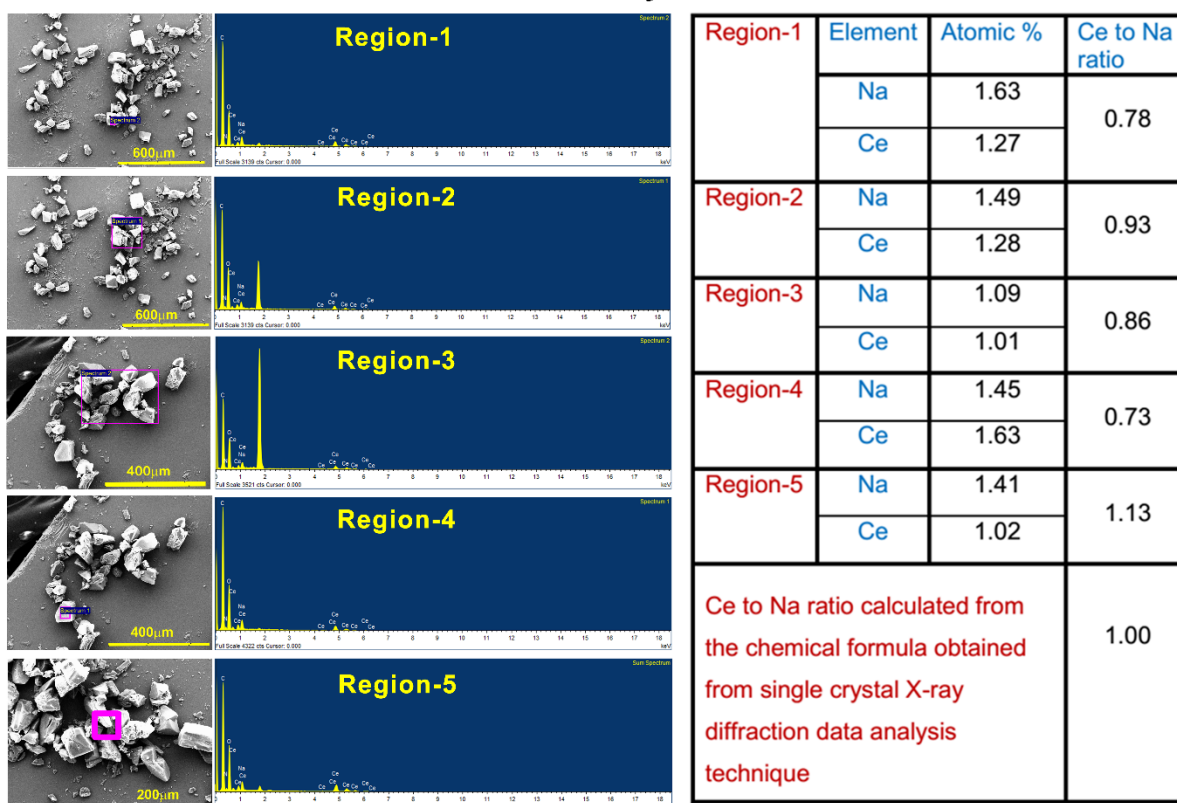

**Figure S6.** Comparison of the Ce to Na ratio of IISERP-MOF24 from SEM-EDX analysis with that obtained from single crystal X-ray analysis data.

**Table-S2.** EDAX elemental analysis data

| Element         | C        |          | N        |          | O        |          | Na       |          | Ce       |          |
|-----------------|----------|----------|----------|----------|----------|----------|----------|----------|----------|----------|
|                 | Weight % | Atomic % |
| <b>Region-1</b> | 51.92    | 64.92    | 3.78     | 4.06     | 29.97    | 28.13    | 2.49     | 1.63     | 11.84    | 1.27     |
| <b>Region-2</b> | 46.91    | 59.40    | 5.12     | 5.56     | 33.94    | 32.27    | 2.24     | 1.49     | 11.78    | 1.28     |
| <b>Region-3</b> | 47.55    | 58.75    | 6.65     | 7.04     | 34.62    | 32.11    | 1.69     | 1.09     | 9.50     | 1.01     |
| <b>Region-4</b> | 49.01    | 63.34    | 3.55     | 3.93     | 30.56    | 29.65    | 2.14     | 1.45     | 14.74    | 1.63     |
| <b>Region-5</b> | 49.40    | 60.87    | 6.36     | 6.73     | 32.40    | 29.97    | 2.20     | 1.41     | 9.65     | 1.02     |

#### 4. Adsorption Analysis

For all gas adsorption analysis was carried out using ~100 mg of IISERP-MOF24. Sample was soaked in THF for 3 days, followed by an evacuation at 150 °C for 12 hrs ( $10^{-6}$  mbar) till an outgas rate was  $\leq 2$   $\mu$ bar/min was achieved. Then the sample was transferred to the analysis port of Micromeritics ASAP 2020HD or 3-FLEX instrument. Gas analyses were performed using ultrahigh purity gases ( $\geq 4.8$  grade).

##### Langmuir Fits:

In all cases the isotherms were fit to the Single-Site Langmuir (SSL) equation. The isotherms were fit by solving the Langmuir equation using the solver function in Microsoft Excel following a similar protocol to Keller *et al.*<sup>S1</sup> Utilizing this routine circumvents some of the problems associated with favouring either high or low pressure regions when linearizing the Langmuir equation<sup>S2</sup> and offers a balanced approach.

##### Single-Site Langmuir (SSL):

$$q_i = q_m \frac{k_i}{1 + k_i P} P$$

##### Dual-Site Langmuir (DSL):

$$q_i = q_{m,1} \frac{K_1}{1 + K_1 P} P + q_{m,2} \frac{K_2}{1 + K_2 P} P$$

##### Ideal Adsorbed Solution Theory (IAST):

IAST calculations were undertaken as described by Prausnitz *et al.*<sup>S3</sup> The selectivity equation involved in calculation is provided below.

##### Selectivity:

$$S_{1,2} = \frac{q_1/q_2}{p_1/p_2}$$

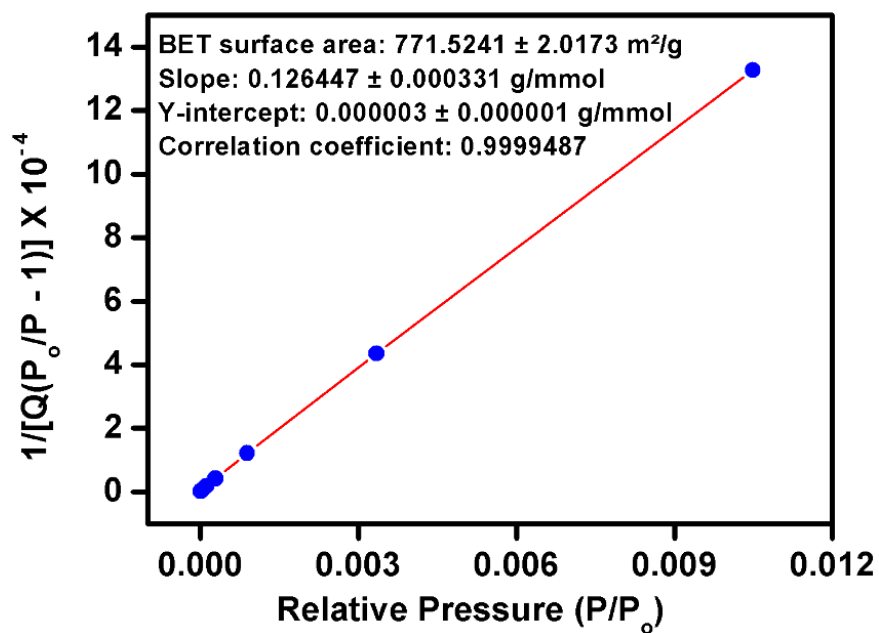

Figure S6. BET fit for the IISERP-MOF24 from the 77 K N<sub>2</sub> isotherm data.

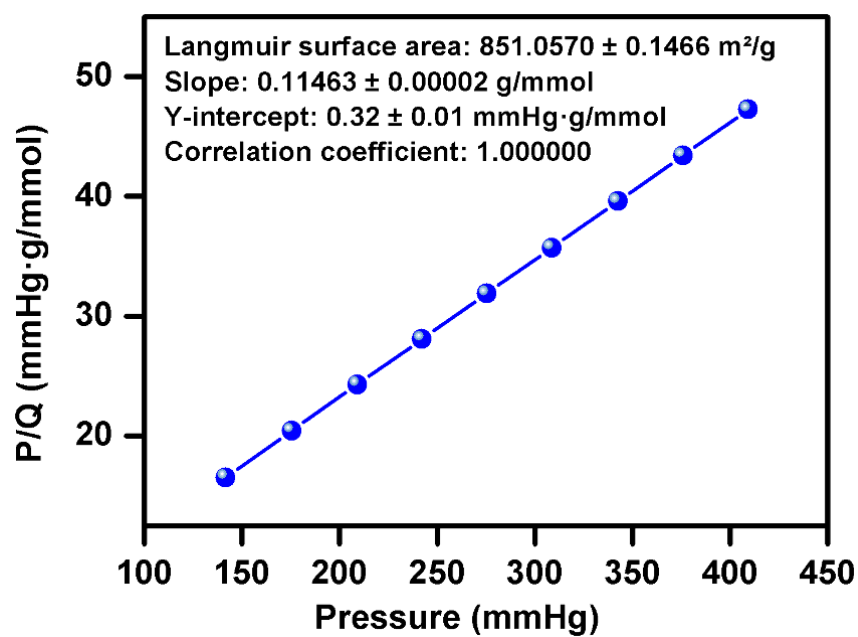

Figure S7. Langmuir fit for the IISERP-MOF24 from the 77 K N<sub>2</sub> isotherm data.

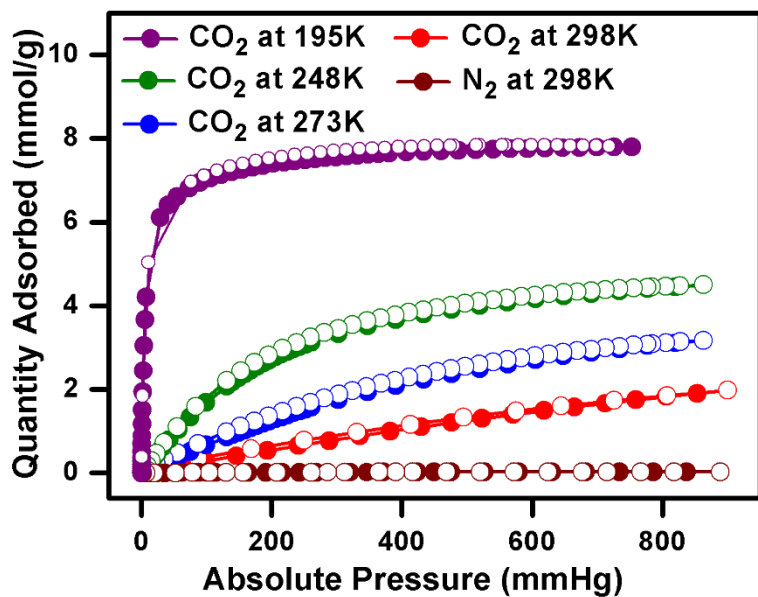

Figure S8. CO<sub>2</sub> isotherms collected at 195, 248, 273 and 298 K along with N<sub>2</sub> isotherms collected at 298K.

**Remark:** At 298 K, there is no uptake of N<sub>2</sub>; whereas there is significant uptake of CO<sub>2</sub>. So, IISERP-MOF24 selectively physisorbs CO<sub>2</sub> over N<sub>2</sub>.

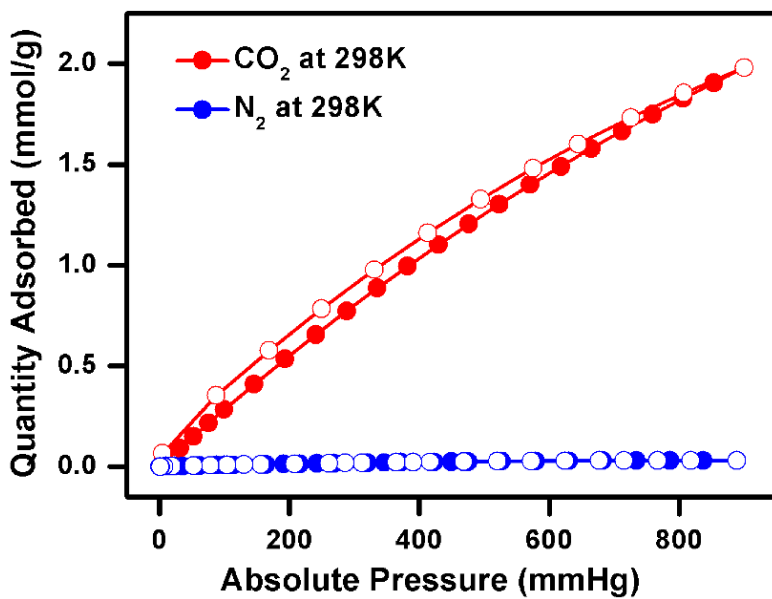

Figure S9. CO<sub>2</sub> and N<sub>2</sub> adsorption isotherms at 298 K showing the selectivity of IISERP-MOF24 towards CO<sub>2</sub> at 298 K and 1 bar.

**Virial analysis:**

Heat of adsorption for CO<sub>2</sub> in IISERP-MOF24 was obtained by fitting the Virial equation (Equ. (1)) to the CO<sub>2</sub> adsorption isotherms measured from 0- 1 bar at 248, 273 and 298 K.

$$\ln(P) = \ln(V_a) + (A_0 + A_1 \cdot V_a + A_2 \cdot V_a^2 + \dots + A_6 \cdot V_a^6) / T + (B_0 + B_1 \cdot V_a) \dots \dots \dots (1)$$

Where, P is pressure, V<sub>a</sub> is amount adsorbed, T is temperature, and A<sub>0</sub>, A<sub>1</sub>, A<sub>2</sub> ... , A<sub>6</sub> and B<sub>0</sub>, B<sub>1</sub> are temperature independent empirical parameters.

**Table S3:** Summary of the fitted Virial parameters for IISERP-MOF24.

|    |              |
|----|--------------|
| A0 | -2674.227686 |
| A1 | -379.4005948 |
| A2 | 68.13796624  |
| A3 | 3.61670552   |
| A4 | 2.581397795  |
| A5 | -1.118482926 |
| A6 | 0.161750942  |
| B0 | 15.15554664  |
| B1 | 1.248964199  |
| B2 | -0.181475587 |
| B3 | 0.01295927   |
| B4 | -0.008084079 |

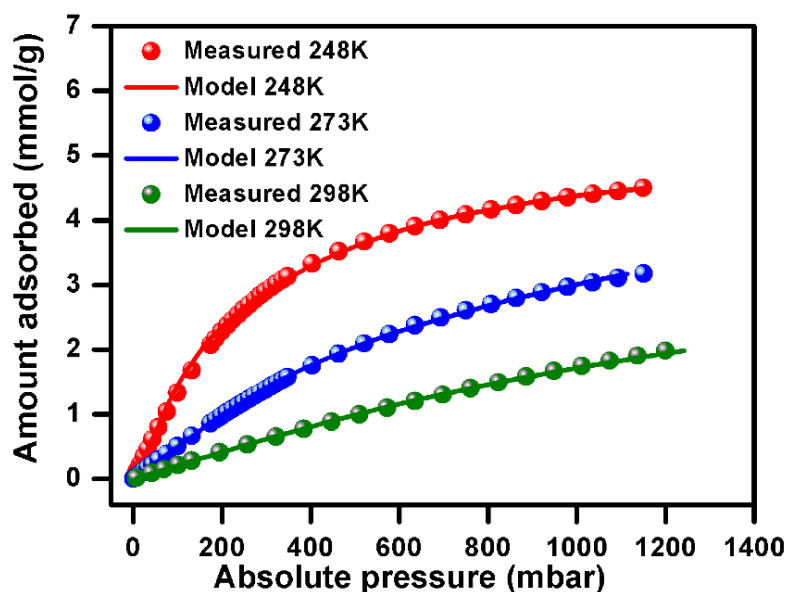

**Figure S10.** Comparison of experimental isotherms to the ones obtained from Virial modelling carried out using CO<sub>2</sub> isotherms collected at 248, 273, and 298 K.

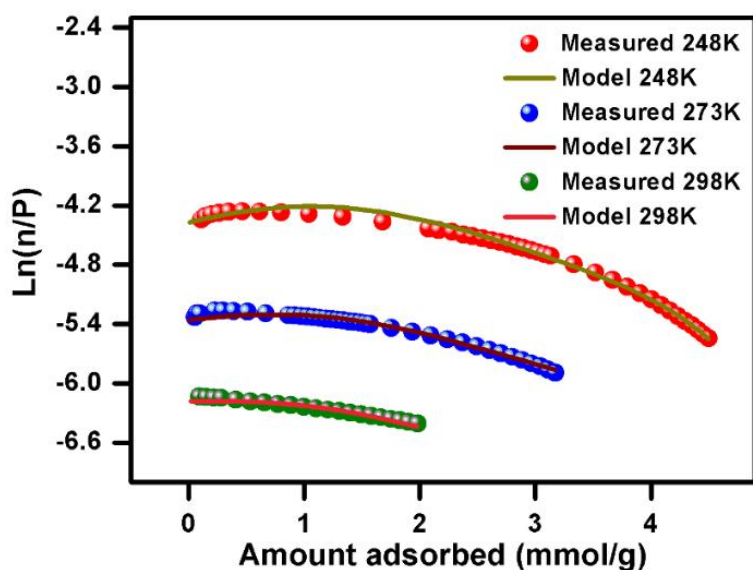

**Figure S11.** Virial fits for the CO<sub>2</sub> isotherms collected at 248, 273, and 298 K.

***IAST selectivities:***

CO<sub>2</sub>/N<sub>2</sub> selectivity was calculated for IISERP-MOF24 using the experimental single component CO<sub>2</sub> and N<sub>2</sub> isotherms and ideal adsorbed solution theory (IAST) with a nominal composition of 15CO<sub>2</sub>:85N<sub>2</sub> (conditions of relevance to post combustion CO<sub>2</sub> capture). A total pressure of 1 bar and temperatures of 298 K & 273 K were employed. IISERP-MOF24 has a CO<sub>2</sub>/N<sub>2</sub> selectivity of 67 and 105. This unusually high selectivity is due to ultra-low nitrogen uptake for the MOF at these temperatures.

***IAST fitting parameters for IISERP-MOF24 (CO<sub>2</sub>/N<sub>2</sub>):***

**At 273K**

**Gas A =CO<sub>2</sub>**

**Gas B = N<sub>2</sub>**

| Gas Mixture     |             |                 |            |
|-----------------|-------------|-----------------|------------|
| YA =            | 0.15        |                 |            |
| YB =            | 0.85        |                 |            |
| Gas A Constants |             | Gas B Constants |            |
| qA1 =           | 4.993007085 | qA1 =           | 0.06135295 |
| qA2 =           | 0           | qA2 =           | 0          |
| kA1 =           | 0.000624444 | kA1 =           | 0.00024766 |
| kA2 =           | 0           | kA2 =           | 0          |
| na1 =           | 1.127025588 | na1 =           | 1.37724099 |
| na2 =           | 0           | na2 =           | 0          |
| HA1 =           | 0           | HB1 =           | 0          |
| HA2 =           | 0           | HB2 =           | 0          |

**At 298K**

**Gas A =CO<sub>2</sub>**

**Gas B = N<sub>2</sub>**

| Gas Mixture     |             |                 |            |
|-----------------|-------------|-----------------|------------|
| YA =            | 0.15        |                 |            |
| YB =            | 0.85        |                 |            |
| Gas A Constants |             | Gas B Constants |            |
| qA1 =           | 6.458188067 | qA1 =           | 0.03890991 |
| qA2 =           | 0           | qA2 =           | 0          |
| kA1 =           | 0.00027967  | kA1 =           | 0.00033726 |
| kA2 =           | 0           | kA2 =           | 0          |
| na1 =           | 1.03926659  | na1 =           | 1.31047808 |
| na2 =           | 0           | na2 =           | 0          |
| HA1 =           | 0.001806162 | HB1 =           | 1.3123E-05 |
| HA2 =           | 0           | HB2 =           | 0          |

With increase of the temperature, thermal energy of the gas molecules increases and the difference in binding energies of CO<sub>2</sub> and N<sub>2</sub>, which are reasonably constant with respect to temperature, becomes less significant, and the selectivity gradually decreases. That is why selectivity at 298 K is less than 273 K. Again, there is a difference of CO<sub>2</sub>/N<sub>2</sub> selectivities at low pressures between two different temperatures (273 K & 298 K) because at low pressure region at 273 K first selectivity decreases and then increases at high pressure region whereas at 298 K the selectivity increases from starting onwards. This is probably due to temperature effect on the framework. Since, BPDC units act as a pillaring agent its two phenyl rings can flip around the C-C single bond under the partial pressure of CO<sub>2</sub> at room temperature to bring a gatepass for CO<sub>2</sub> entrance from starting onwards while at 273 K the flipping of phenyl rings are restricted due to low energy input which creates obstacle for CO<sub>2</sub> entrance at low pressure region. At high pressure region at 273 K the CO<sub>2</sub> partial pressure is high enough to bring gatepass for CO<sub>2</sub> entrance and that is why selectivity increases gradually. The selectivity increases in both the cases as there is various types of interactions such as CO<sub>2</sub>-framework, CO<sub>2</sub>...Na<sup>+</sup> and CO<sub>2</sub>...CO<sub>2</sub> interactions.

***CO<sub>2</sub> cycling Experiment Procedure:***

Isotherm cycling experiments were done using ASAP 2020HD instrument associated with Iso-Cycling software. About 100 mg of samples were loaded in the sample cell and activated until the outgas rate was  $\leq 2 \mu\text{bar}/\text{min}$ . The iso-cycling program was created with 15 cycles, each cycle having 14 to 15 data points (equilibration time 100 sec) in between 0.015 bar to 1.2 bar. After each cycle, the material was maintained under vacuum for 10 mins before continuing the subsequent cycles.

***Rate of adsorption studies- CO<sub>2</sub> self-diffusion coefficients calculations and analysis Diffusion coefficient determination from Rate of Adsorption (ROA) measurements:***



Rate of adsorption (ROA) experiments were carried out on the Micromeritics ASAP2020HD instrument equipped with a ROA software capabilities. An extremely high resolution isotherm measurement was carried out using the ASAP2020HD instrument at 273 K in the pressure range of 0-1 bar. The diffusion coefficient was calculated as a function of CO<sub>2</sub> loading. For this purpose, 8 different loading points were used and each of the ROA data was fitted to a spherical pore model<sup>54</sup>  $F$  = fractional uptake;  $\tau$  = non-dimensional time given by  $\tau = Dt/R^2$ , where  $R$ = particle size;  $t$ = time (secs);  $D$  = apparent diffusivity. The single-component diffusion coefficient was estimated to be  $8.1932 \times 10^{-9} \text{ m}^2/\text{s}$  for IISERP-MOF24 taking the average of these eight points. Note: the kinetics of the low loadings (< 1 mmol/g) were extremely hard to model.

$$F = 1 - \frac{6}{\pi^2} \sum_{n=1}^{\infty} \frac{1}{n^2} \text{Exp}(-n^2\pi^2\tau)$$

### 5. Stability studies

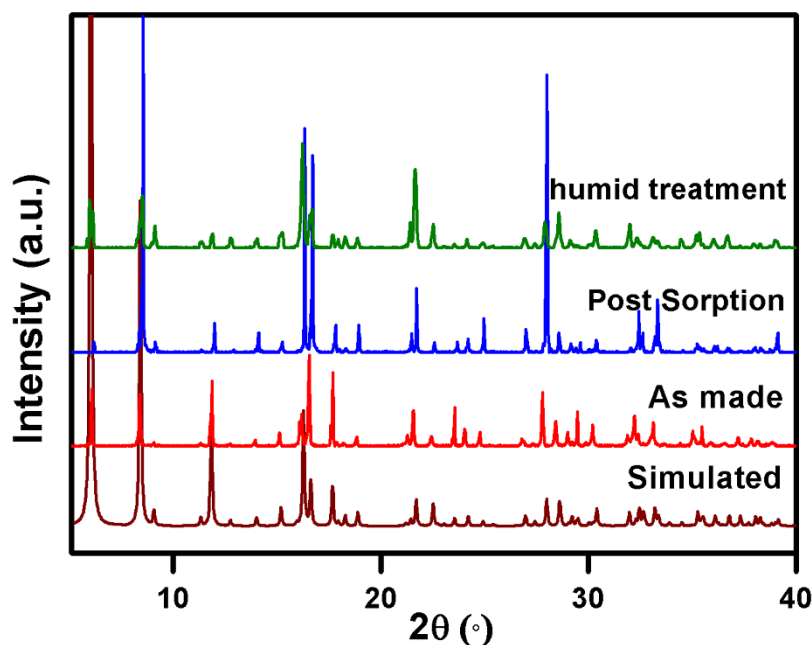

**Figure S12.** PXRD comparisons indicating the complete retention of crystallinity by IISERP-MOF24 following repeated heating and cooling during multiple gas adsorption runs followed by exposure to open atmosphere. For the humid treatment, the sample was exposed to a humid stream of N<sub>2</sub> (75%RH) for about 12 hrs.

IISERP-MOF24 has excellent shelf-life - complete retention of porosity even after 6 months on the shelf.

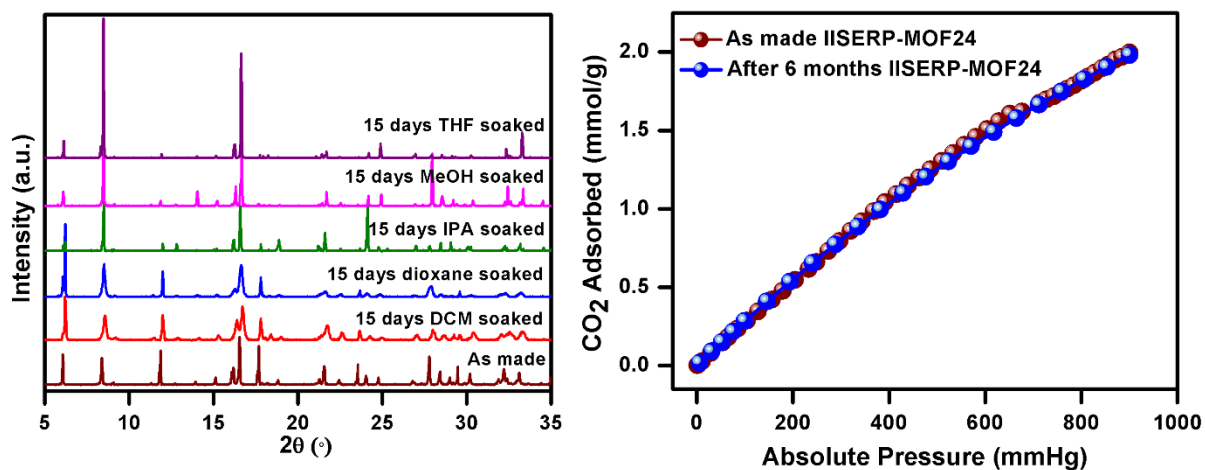

**Figure S13.** Stability studies: left: PXRDs showing the exceptional solvent stability of IISERP-MOF24, Right: IISERP-MOF24 retains complete porosity even after 6 months keeping on shelf.

The complete retention of crystallinity was also observed in the microscopic crystal images of IISERP-MOF24 for pre- & post- sorption treated samples.

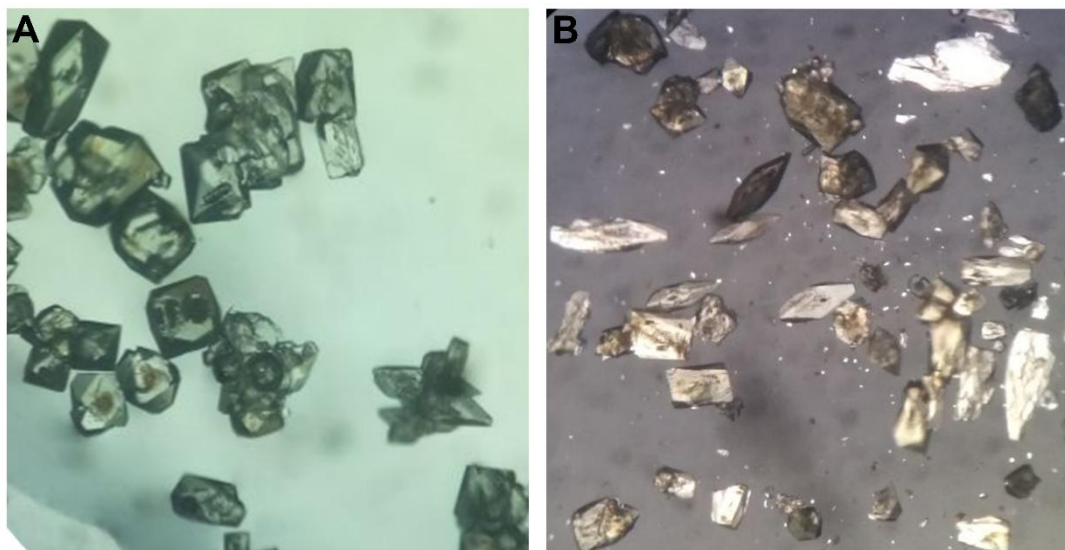

**Figure S14.** Optical microscopic images showing comparisons between the state of (A) pre-sorption and (B) post-sorption sample of IISERP-MOF24.

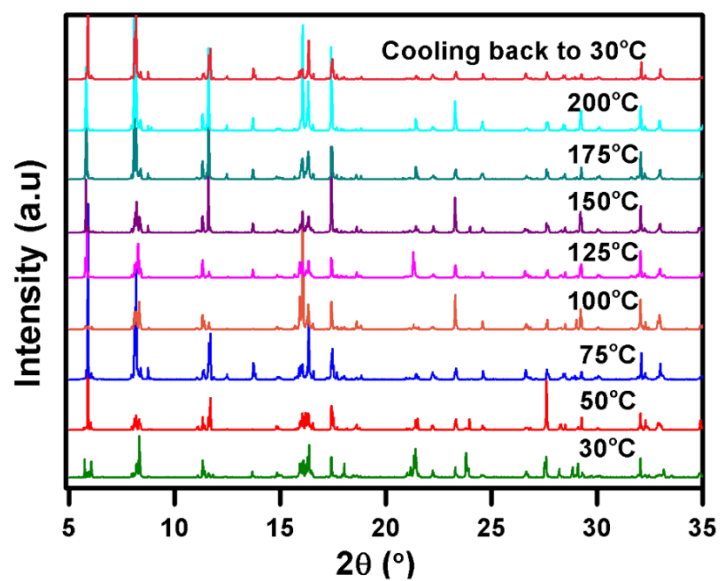

**Figure S15.** Variable temperature PXRD for displaying complete retention of crystallinity to temperatures as high as 200 °C.

## 6. Simulation Studies:

All the simulations have been carried out using Material Studio program V.6.0 (Accelrys). The adsorption isotherms were simulated using the Grand Canonical Monte Carlo routine embedded in the Materials Studio V6 software. For this, considering that CO<sub>2</sub> is a small probe with no torsional degree of freedom, a Metropolis algorithm was employed. Universal force field was used. The isotherm simulations were carried out over three times and the error bars were calculated. The simulated isotherm matched well with the experimental one (Fig. S16). From this GCMC simulated structure, the most probable densities of CO<sub>2</sub> were found to be well distributed in the entire pore space. For the binding site location, the framework was frozen and the CO<sub>2</sub> molecules were allowed to find the again using the GCMC routine. An automated temperature control and Universal force field were used with about 1000000 steps per cycle. Applying rotational and translation freedom did not make much of a change in the positions or the orientations in the minimized structure. Energy distribution, density and energy field were all optimized. The CO<sub>2</sub> positions were obtained from the lowest energy configuration have been shown in Figure 4.

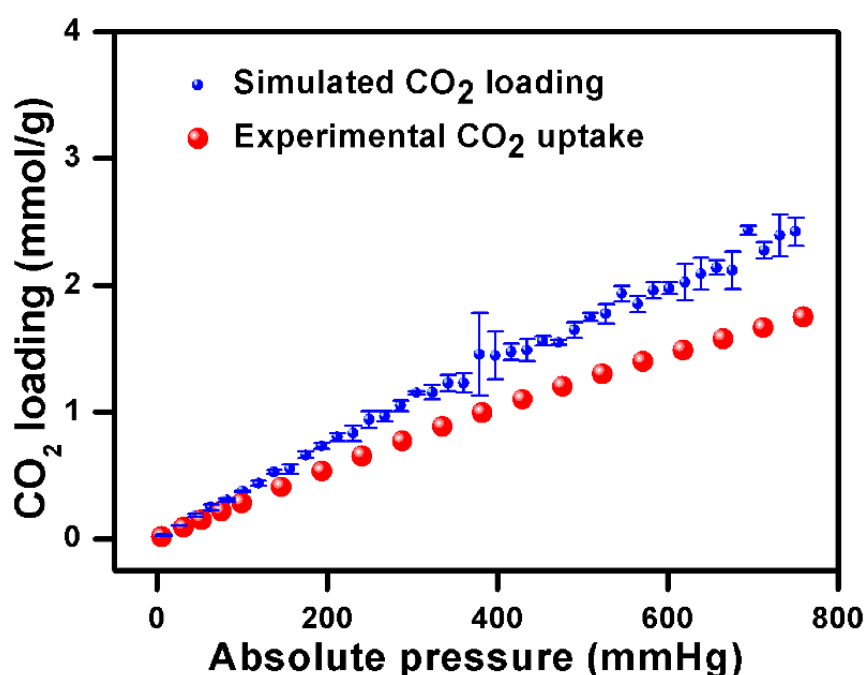

**Figure S16.** Experimental and simulated CO<sub>2</sub> adsorption isotherms of IISERP-MOF24 at 298 K (0 to 1 bar). The isotherms were simulated using the Grand Canonical Monte Carlo methods embedded in the Materials Studio V6.

## References

- (S1) G. Kemmer, S. Keller, *Nat. Protoc.* 2010, **5**, 267.
- (S2) E. Richter, W. Schuetz, A. L. Myers, *Chem. Eng. Sci.* 1989, **44**, 1609.
- (S3) A. L. Myers, J. M. Prausnitz, *AIChE J.*, 1965, **11**, 121.
- (S4) (a) K. Malek and M.-O. Coppens, *J. Chem. Phys.*, 2003, **119**, 2801; (b) Adsorption analysis and equilibria and kinetics, D. D. Do, Imperial College Press, Ed. 2008.
